# Supplementary material
Source: PubMed Central journal article supplement (PMC3082473)
Supplement: NIHMS270961-supplement-supp_data.pdf [file NIHMS270961-supplement-supp_data.pdf]

# Supporting Information

## **An electrochemical super-sandwich assay for sensitive and selective DNA detection in complex matrices**

Fan Xia,<sup>†,‡</sup> Ryan J. White,<sup>‡</sup> Xiaolei Zuo,<sup>\*,‡</sup> Adriana Patterson,<sup>‡</sup> Yi Xiao,<sup>‡</sup> Di Kang,<sup>‡</sup>

Xiong Gong,<sup>§</sup> Kevin W. Plaxco,<sup>\*,‡</sup> and Alan J. Heeger<sup>\*,†</sup>

*<sup>†</sup> Center for Polymers and Organic Solids, University of California, Santa Barbara.*

*<sup>‡</sup> Department of Chemistry and Biochemistry, University of California, Santa Barbara.*

*<sup>§</sup> Department of Physics, University of California, Santa Barbara.*

1. The gel-electrophoresis show different base pairs between the traditional structure and the super-sandwich structure.

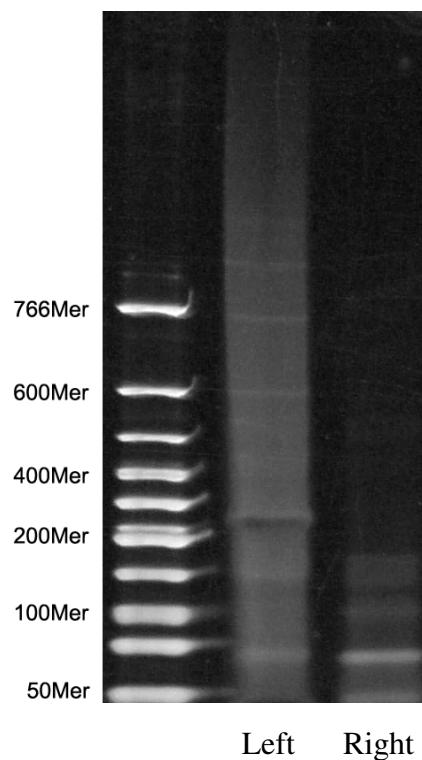

**Figure S1.** The gel-electrophoresis results confirm the formation of the super-sandwich structure (as we can see, the left lane exhibits a ladder of different length of super-sandwich structure and the maximum length is about 1000 base pairs. Correspondingly, the right lane exhibits traditional-sandwich structure's bands about less than 75 base pairs.).

## 2. Electron transfer rates

We have used square wave voltammetry to compare the electron transfer kinetics<sup>1</sup> of these two systems and find that the electron transfer kinetics of the super-sandwich assay,  $1.0 \text{ s}^{-1}$  are quite similar to the  $1.2 \text{ s}^{-1}$  observed for the traditional assay. Although the super-sandwich contains more methylene blues than the traditional assay, unfortunately, this is difficult to do as the electron transfer from regions of the super-sandwich complex distal from the electrode is likely much less efficient than electron transfer from redox reporters located nearer the electrode.

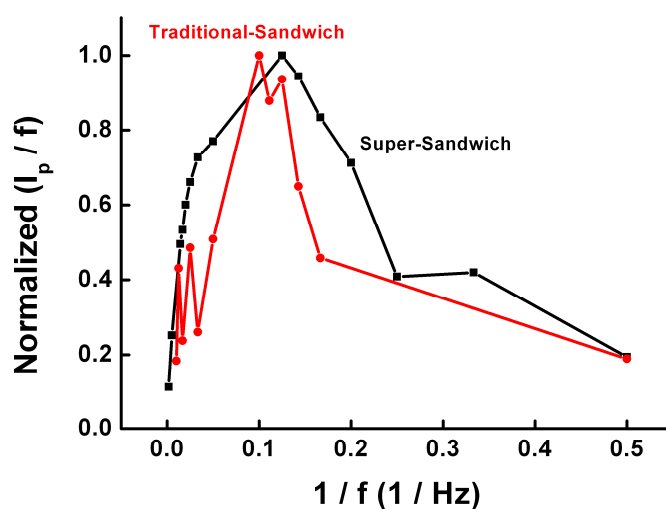

**Figure S2.** Square wave voltammetry has been used to compare the electron transfer kinetics of these two systems and find that the electron transfer kinetics of the super-sandwich assay,  $1.0 \text{ s}^{-1}$  are quite similar to the  $1.2 \text{ s}^{-1}$  observed for the traditional assay.

### 3. Specificity of the super-sandwich assay.

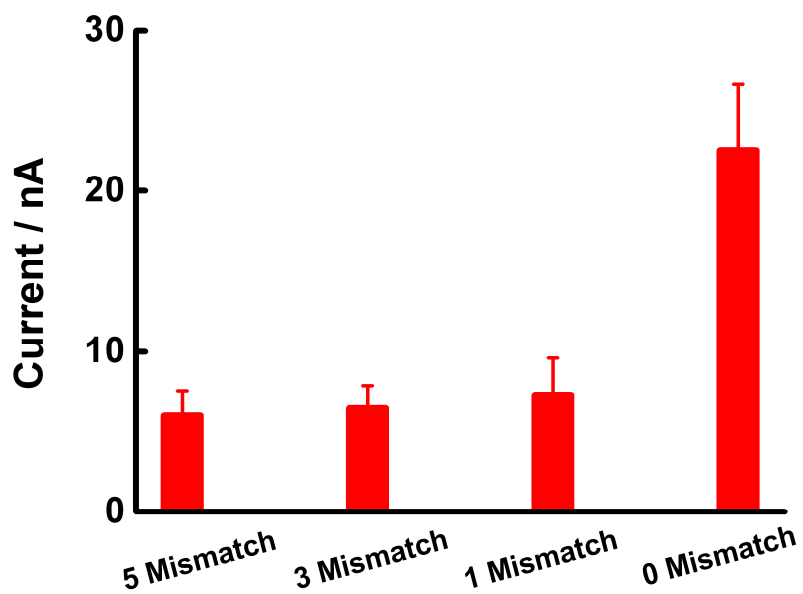

**Figure S3.** The super-sandwich assay is also specific. In order to evaluate this, we challenged our assay using one-base, three-base and five-base mismatched targets and found that it readily discriminates between these mismatched targets.

#### 4. Materials and methods.

##### Materials.

Labeled oligonucleotides were synthesized by Biosearch Technologies, Inc. (Navato,CA), purified by C18 HPLC, confirmed by mass spectrometry and used as received. The sequences of these oligomers are:

##### Capture probe:

5'-SH-(CH<sub>2</sub>)<sub>6</sub>-CGGC ACC TGG GGG AGT ATT GCG GAG GAA GGT GCCG-3'

##### Signal probe (Super-sandwich):

5'-CGGC ACC TGG GGG AGT ATT GCG GAG GAA GGT GCCG-Methylene Blue-3'

##### Target:

5'-T ACTCCCCCAGGT GCCG A CGGC ACCTTCCTCCGC A-3'

##### Signal probe (Traditional sandwich):

5'-CGGC ACC TGG GGG AGT AT-Methylene Blue-3'

##### 1-Mismatch Target:

5'-T ACTCCCCCAGGT GCGG A CGGC ACCTTCCTCCGC A-3'

##### 3-Mismatch Target:

5'-T ACTCCCCCAGGT CGGG A CGGC ACCTTCCTCCGC A-3'

##### 5-Mismatch Target:

5'-T ACTCCCCCAGGA CGGC A CGGC ACCTTCCTCCGC A-3'

##### Super-sandwich Assay Sequences:

5'-(SH)-CGGCACCTGGGGAGTATTGCGGAGGAAGGTGCCG-3' (Capture Probe)

3'-ACGCCTCCTCCACGGCAGCCGTGGACCCCTCAT-5' (Target)

5'-CGGCACCTGGGGAGTATTGCGGAGGAAGGTGCCG(MB)-3' (Signal Probe)

3'-ACGCCTCCTCCACGGCAGCCGTGGACCCCTCAT-5' (Target)

(Signal Probe) 5'-CGGCACCTGGGGAGTATTGCGGAGGAAGGTGCCG(MB)-3'

.....

.....

##### Traditional Assay Sequences:

5'-(SH)-CGGCACCTGGGGAGTATTGCGGAGGAAGGTGCCG-3' (Capture Probe)

3'-ACGCCTCCTCCACGGCAGCCGTGGACCCCTCAT-5' (Target)

5'-CGGCACCTGGGGGAGTAT(MB)3' (Signal Probe)

## 5. Fabrication of Sensors:

Polycrystalline gold disk electrodes (2mm diameter, CH Instruments, Austin, TX) were prepared by polishing with 1  $\mu\text{m}$  diamond and 0.5  $\mu\text{m}$  alumina (Buehler, Lake Bluff, IL), sonicating in water, and electrochemically cleaning (a series of oxidation and reduction cycles in 0.5 M  $\text{H}_2\text{SO}_4$ , 0.01 M  $\text{KCl}/0.1$  M  $\text{H}_2\text{SO}_4$ , and 0.05 M  $\text{H}_2\text{SO}_4$ ) before modification with probe DNA by incubating the clean electrode in 0.6  $\mu\text{M}$  DNA / 5  $\mu\text{M}$  TCEP (tris(2-carboxyethyl) phosphine hydrochloride) in Tris buffer (pH 7.4) for 30 min. The surface was then rinsed with water and subsequently passivated with 2 mM 6-mercaptohexanol in Tris buffer, for 2 hours. Prior to use, electrodes were rinsed with deionized water.

Electrochemical measurements were conducted using square wave voltammetry (SWV) with a CHI 650b potentiostat (CH instruments, Austin, TX). SWV was performed using a potential window -0.15 to -0.4 V (versus  $\text{Ag}/\text{AgCl}$ ), a potential step of 0.001 V, an amplitude of 0.05 V and a frequency of 60 Hz. The electrolyte and hybridization buffer used in this study was 10 mM Tris buffer (pH 7.4) with 500 mM  $\text{NaCl}$  and 1 mM  $\text{MgCl}_2$ . The hybridization time is 1 hour.

The data points and error bars represent the average and standard deviations from at least three independently fabricated electrodes and are dominated by sensor-to-sensor variation arising from the fabrication process (relative sensor response (%), is employed because this is more reproducible from electrode-to-electrode than the absolute current change).

## Reference

1. White, R. J.; Plaxco, K. W. *Anal. Chem.* **2010**, 82, 73-6.
